# Supplementary material for: Baicalein Inhibits Stx1 and 2 of EHE: Effects of Baicalein on the Cytotoxicity, Production, and Secretion of Shiga Toxins of Enterohaemorrhagic Escherichia coli
Source: MDPI journal article supplement (doi:10.3390/toxins11090505), 2019-08-29
Supplement: s1 [file s1]

# Supplementary Materials: Baicalein Inhibits Stx1 and 2 of EHEC: Effects of Baicalein on the Cytotoxicity, Production and Secretion of Shiga Toxins of Enterohaemorrhagic *Escherichia coli*

Pham Thi Vinh, Yui Shinohara, Akifumi Yamada, Hoang Minh Duc, Motokazu Nakayama, Tadahiro Ozawa, Jun Sato, Yoshimitsu Masuda, Ken-Ichi Honjoh and Takahisa Miyamoto

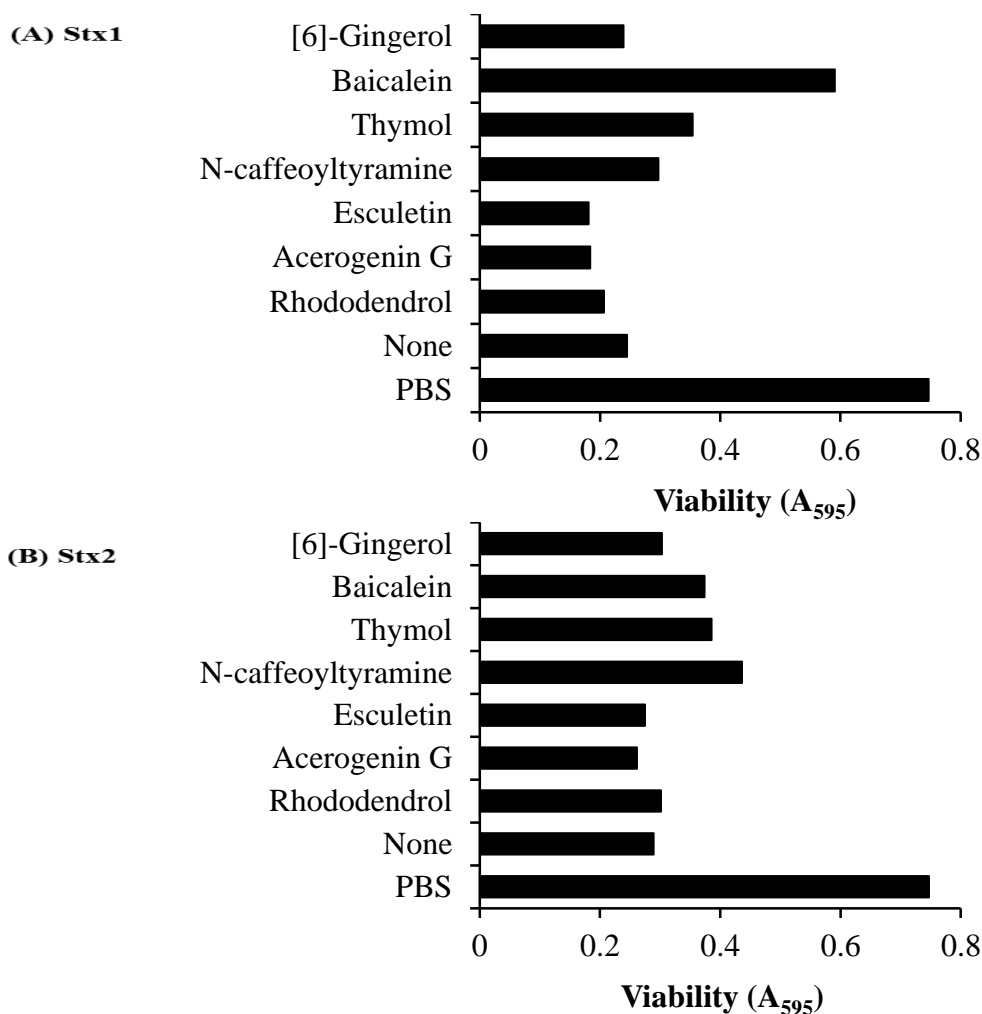

**Figure S1.** Effects of polyphenols on the cytotoxicity of Stx1 and Stx2. Stx1 (A) and Stx2 (B) preparations containing Stx1 and Stx2 at 12.5 and 50 mg/L, respectively were mixed without (None) or with 100 mg/L of each of the polyphenols and incubated at 37 °C for 1 h. After the incubation, the mixture was added to the culture of Vero cells. Cell viability was determined by using MTT Cell Proliferation Assay after cultivation at 37 °C for 24. The values are the average of two separate experiments.
